# Supplementary material
Source: PubMed Central journal article supplement (PMC5588877)
Supplement: NIHMS900620-supplement-1.pdf [file NIHMS900620-supplement-1.pdf]

## Supporting Information

### **A low cost mobile phone dark-field microscope for nanoparticle-based quantitative studies**

*Dali Sun<sup>a</sup>, Tony Y. Hu<sup>a\*</sup>*

<sup>a</sup> School of Biological and Health Systems Engineering, Virginia G. Piper Biodesign Center for Personalized Diagnostics, The Biodesign Institute, Arizona State University, 727 E. Tyler St. B 130-B, Tempe, AZ 85287, United States.

Corresponding author. Fax: + 1 480-965-3051; Tel.:+ 1 480-727-1880; E-mail address: tyhu@asu.edu

#### Table of contents

|                                           |    |
|-------------------------------------------|----|
| <b>Experimental Section</b> .....         | S2 |
| <b>Exosome quantification assay.</b> .... | S2 |
| <b>Tables</b> .....                       | S3 |
| <b>Figures</b> .....                      | S6 |
| <b>Reference</b> .....                    | S8 |

## Experimental Section

### Exosome quantification assay.

The AuNR probe was generated by adding 40  $\mu\text{L}$  of neutravidin-labeled AuNRs (Nanopartz C12-25-650-TN-50,  $7 \times 10^{-9}$  M) to 200  $\mu\text{L}$  PBS, then added 20  $\mu\text{L}$  biotinylated CD9 antibody (NB110-81616, Novus, 0.5mg/mL), and sonicated the mixture for 8 minutes at 80% amplitude using a 5 second on/off cycle (Q500 Sonicator, Qsonica) to accelerate conjugation. AuNR samples were then centrifuged at  $4000 \times g$  for 10 min, aspirated, resuspended in 400  $\mu\text{L}$  PBS and washed twice more using the same protocol, then resuspended in 200  $\mu\text{L}$  PBS and stored at  $4^\circ\text{C}$  until use. Protein A/G-modified 192-well slides (Arrayit) were incubated with 1  $\mu\text{L}$ /well anti-LAM IgG (courtesy of BEI Resources) and sonicated at  $37.5^\circ\text{C}$  for 8 minutes at 80% amplitude using a 5 second on/off cycle (Q500 Sonicator, Qsonica) to accelerate IgG binding. Slides were then blocked with 1  $\mu\text{L}$ /well 5% BSA (Thermo Scientific) for 1 hour at  $37.5^\circ\text{C}$  and PBS-washed 3 times before use. Slides were loaded with 1  $\mu\text{L}$ /well of 2-fold PBS-diluted serum, PBS-washed times, and incubated with anti-CD9 IgG-conjugated-AuNRs for 1 hour at  $37.5^\circ\text{C}$  in a humidified chamber, then washed for 10 min at  $25^\circ\text{C}$  with PBS and 0.01% Tween-20 (PBST, pH 7.0), rinsed with deionized water, and air-dried for DFM imagery.

## Tables

**Table S1.** Cost list of the MDFM.

| Item                      | Supplier   | Cost (\$)   |
|---------------------------|------------|-------------|
| Objective Lens (10×/20×)* | Olympus    | 200 / 400   |
| Condenser                 | Olympus    | 920         |
| Case                      | 3dhubs.com | 60          |
| Mobile Phone              | Motorola   | 180         |
| Total                     |            | 1360 / 1560 |

\* Lens details in Table S3

**Table S2.** MDFM and DDFM inter-assay and intra-assay reproducibility.

| Assay                     | Concentration<br>μg/μL | Precision (% CV) |      |             |      |
|---------------------------|------------------------|------------------|------|-------------|------|
|                           |                        | Inter-assay      |      | Intra-assay |      |
|                           |                        | MDFM             | DDFM | MDFM        | DDFM |
| Binding<br>affinity       | 0.091                  | 13.65            | 5.51 | 5.11        | 5.52 |
|                           | 0.023                  | 11.69            | 3.86 | 3.76        | 4.20 |
|                           | 0.005                  | 9.83             | 3.89 | 3.20        | 1.60 |
| Protein<br>quantification | 0.083                  | 8.06             | 6.02 | 3.06        | 2.14 |
|                           | 0.021                  | 10.89            | 5.74 | 7.37        | 2.30 |
|                           | 0.005                  | 13.32            | 8.02 | 7.79        | 7.72 |

**Table S3.** Objective lens specification for MDFM.

|                       | 10×         | 20×          |
|-----------------------|-------------|--------------|
| Manufacturer          | Olympus     | Olympus      |
| Model                 | CACHN10XPHP | LCACHN20XPHP |
| Numerical Aperture    | 0.25        | 0.4          |
| Working Distance (mm) | 8.8         | 3.2          |
| F Number              | 22          | 22           |

**Table S4.** Demographic and Clinical data of the exosome analysis cohort. The HTI cohort that served as a source of case and control samples in this study were the subjects of a large, population-based TB surveillance study that performed active surveillance of all confirmed TB cases in Houston/Harris County, Texas between 1995 and 2004.

| Group   | Labels  | Age | Gender | TB Diagnosis | Culture Positive | Skin Test Positive |
|---------|---------|-----|--------|--------------|------------------|--------------------|
| TB      | 1153.01 | 16  | M      | Yes          | No               | Yes                |
|         | 1150.01 | 13  | F      | Yes          | No               | Yes                |
|         | 1133.01 | 17  | M      | Yes          | Yes              | Yes                |
|         | 1121.01 | 9   | M      | Yes          | No               | Yes                |
|         | 1109.01 | 16  | F      | Yes          | Yes              | Yes                |
| Healthy | 1113.05 | 9   | M      | No           | N/A              | N/A                |
|         | 1139.04 | 17  | F      | No           | N/A              | N/A                |
|         | 1076.10 | 11  | M      | No           | N/A              | N/A                |
|         | 1170.05 | 8   | F      | No           | N/A              | N/A                |
|         | 1182.04 | 4   | F      | No           | N/A              | N/A                |

**Table S5** Summary of mobile phone microscope studies.

| #                   | Researchers                | Target             | Application | Illumination | Field |
|---------------------|----------------------------|--------------------|-------------|--------------|-------|
| <b>Pathogens</b>    |                            |                    |             |              |       |
| 1                   | (Pirnstill and Coté, 2015) | Malaria parasites  | I           | BF           | NF    |
| 2                   | (Koydemir et al., 2015)    | Giardia parasites  | I & Q       | BF           | FF    |
| 3                   | (D'Ambrosio et al., 2015)  | Filarial parasites | I & Q       | BF           | FF    |
| 4                   | (Ame et al., 2013)         | Helminth parasites | I           | BF           | FF    |
| <b>Cells</b>        |                            |                    |             |              |       |
| 5                   | (Phillips et al., 2015)    | Cells              | I           | BF & DF      | FF    |
| 6                   | (Switz et al., 2014)       | Epithelial cell    | I           | BF           | FF    |
| 7                   | (Skandarajah et al., 2014) | Red blood cells    | I & Q       | BF           | FF    |
| 8                   | (Lee and Yang, 2014)       | Cells              | I           | BF           | FF    |
| 9                   | (Breslauer et al., 2009)   | Blood cells        | I           | BF           | FF    |
| <b>Biomolecules</b> |                            |                    |             |              |       |
| 10                  | (Wang et al., 2017)        | BSA                | I & Q       | BF           | FF    |
| 11                  | (Archibong et al., 2017)   | Hemoglobin         | I & Q       | BF           | FF    |
| 12                  | (Lee et al., 2017)         | estradiol          | I & Q       | BF           | FF    |
| 13                  | (Khan et al., 2015)        | Glucose            | Q           | BF           | FF    |
| 14                  | (Berg et al., 2015)        | HSV-1 IgG          | Q           | BF           | FF    |
| 15                  | (Lee et al., 2011)         | DNA                | Q           | BF           | FF    |
| 16                  | (Zhang et al., 2011)       | DNA                | I & Q       | BF           | FF    |
| <b>Particles</b>    |                            |                    |             |              |       |

|    |                              |                      |       |    |    |
|----|------------------------------|----------------------|-------|----|----|
| 17 | (Wei et al., 2013)           | Fluorescent particle | I & Q | BF | NF |
| 18 | (Preechaburana et al., 2011) | Gold Particle        | I & Q | BF | FF |
| 19 | (Lu et al., 2009)            | Gold Particle        | I & Q | BF | FF |

I: imaging; Q: quantification; BF: bright-field; DF: dark-field; NF: near-field; Far-field: FF

## Figures

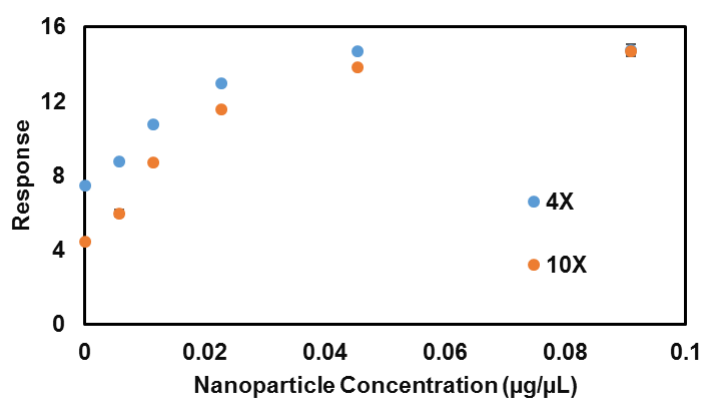

**Figure S1.** DSM response comparison of different magnification (4X and 10X objective lens) under DFM high resolution (4080x3072 px) for binding affinity assay same as shown in Figure 4a.

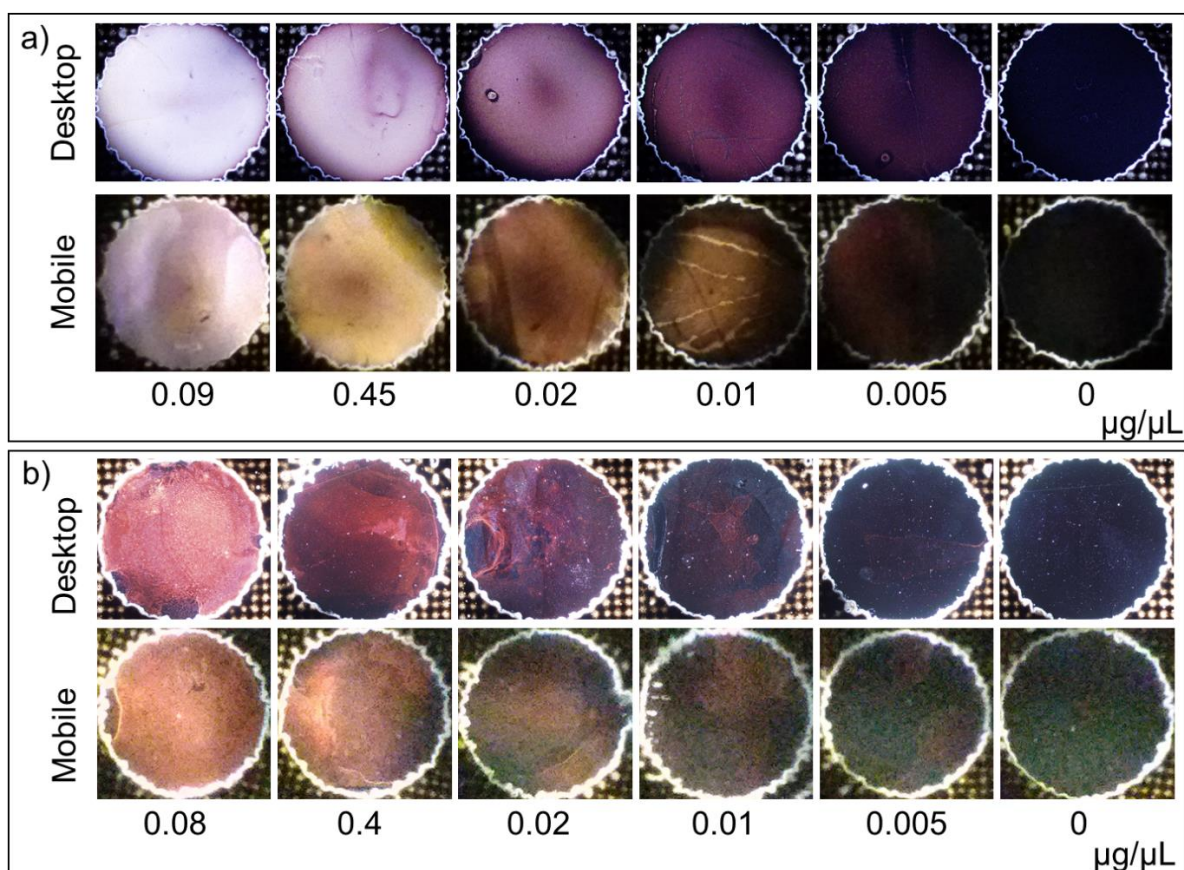

**Figure S2.** Representative images by MDFM and DDFM for a) binding affinity assay (b) protein quantification assay along with nanoparticle and target concentration gradient respectively.

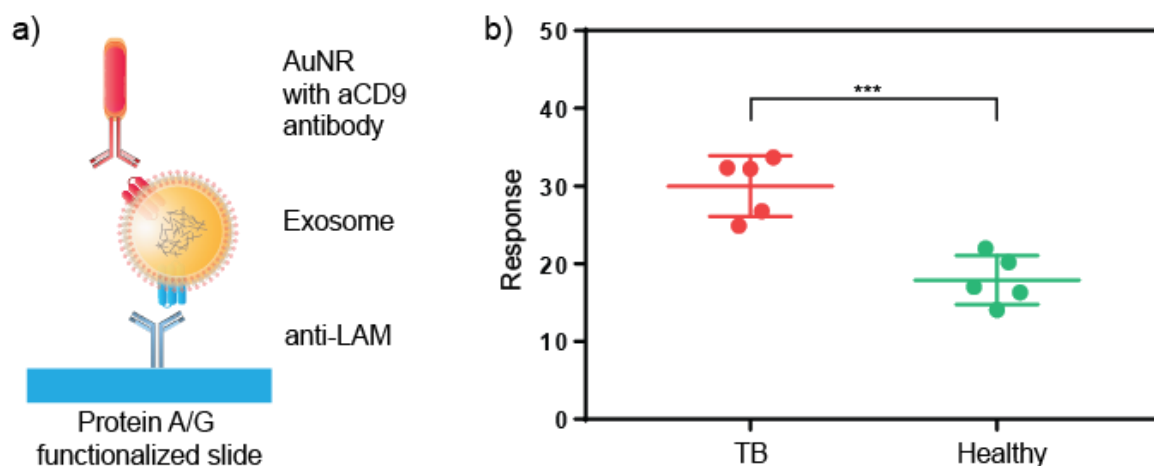

**Figure S3.** Exosome quantification scheme. Antibody-labeled detection wells bind exosomes derived from cells that have internalized *Mycobacterium tuberculosis* (*Mtb*) bacilli by binding the *Mtb* antigen lipoarabinomannan (LAM). These *Mtb*-derived exosomes are mixed with a nanoparticle-labeled probe that binds CD9, a pan-specific exosome biomarker, and quantified by DFM image analysis. (b) DSM-quantified *Mtb* exosome concentrations in serum samples of pediatric patients with tuberculosis (TB) and healthy controls. Data are presented as mean  $\pm$  SEM, N=5/group; \*\*\*p=0.0007 by two-sided Mann-Whitney U-test. Table S4 is the demographic information of the cohort.

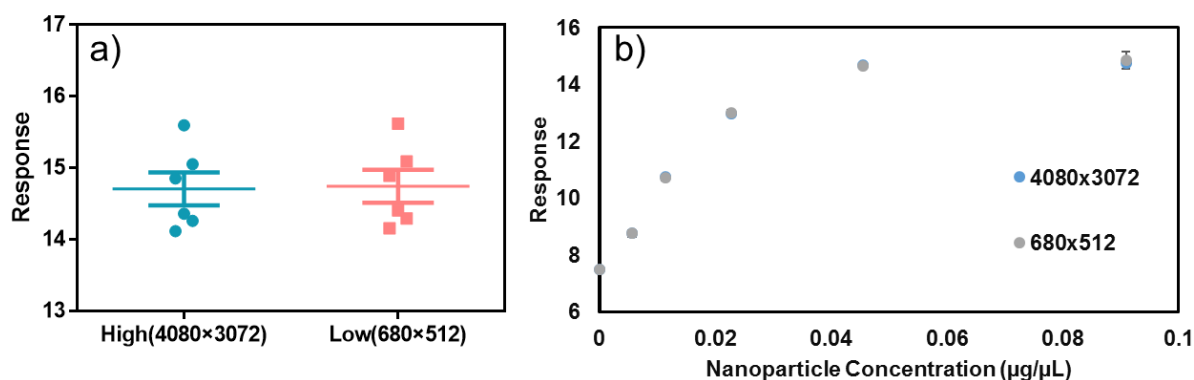

**Figure S4.** Comparison of quantification results from high (4080x3072) and low (680x512) resolution DDFM images at (a) a single concentration point (0.023  $\mu\text{g}/\mu\text{L}$ ) and (b) across multiple concentration values (0  $\mu\text{g}/\mu\text{L}$  to 0.09  $\mu\text{g}/\mu\text{L}$ ) for the assay scheme depicted in Figure 4a. Graphs depict Mean  $\pm$  SD values for each concentration value. The mean ratios of paired low-resolution to high-resolution response values for a) and b) were  $0.9976 \pm 0.0005$  and  $0.9992 \pm 0.0036$ , respectively.

## Reference

- Ame, S.M., Ali, S.M., Keiser, J., Bogoch, I.I., Andrews, J.R., Speich, B., 2013. Short Report : Mobile Phone Microscopy for the Diagnosis of Soil-Transmitted Helminth Infections : A Proof-of-Concept Study 88, 626–629. doi:10.4269/ajtmh.12-0742
- Archibong, E., Konnaiyan, K.R., Kaplan, H., Pyayt, A., 2017. A mobile phone-based approach to detection of hemolysis. *Biosens. Bioelectron.* 88, 204–209. doi:10.1016/j.bios.2016.08.030
- Berg, B., Cortazar, B., Tseng, D., Ozkan, H., Feng, S., Wei, Q., Chan, R.Y.L., Burbano, J., Farooqui, Q., Lewinski, M., Di Carlo, D., Garner, O.B., Ozcan, A., 2015. Cellphone-Based Hand-Held Microplate Reader for Point-of-Care Testing of Enzyme-Linked Immunosorbent Assays. *ACS Nano* 9, 7857–7866. doi:10.1021/acsnano.5b03203
- Breslauer, D.N., Maamari, R.N., Switz, N.A., Lam, W.A., Fletcher, D.A., 2009. Mobile phone based clinical microscopy for global health applications. *PLoS One* 4, 1–7. doi:10.1371/journal.pone.0006320
- D'Ambrosio, M. V., Bakalar, M., Bennuru, S., Reber, C., Skandarajah, A., Nilsson, L., Switz, N., Kamgno, J., Pion, S., Boussinesq, M., Nutman, T.B., Fletcher, D.A., 2015. Point-of-care quantification of blood-borne filarial parasites with a mobile phone microscope. *Sci. Transl. Med.* 7, 286re4-286re4. doi:10.1126/scitranslmed.aaa3480
- Khan, S.A., Smith, G.T., Seo, F., Ellerbee, A.K., 2015. Label-free and non-contact optical biosensing of glucose with quantum dots. *Biosens. Bioelectron.* 64, 30–35. doi:10.1016/j.bios.2014.08.035
- Koydemir, H.C., Gorocs, Z., Tseng, D., Cortazar, B., Feng, S., Chan, R.Y.L., Burbano, J., McLeod, E., Ozcan, A., 2015. Rapid imaging, detection and quantification of *Giardia lamblia* cysts using mobile-phone based fluorescent microscopy and machine learning. *Lab Chip* 15, 1284–1293. doi:10.1039/C4LC01358A
- Lee, D., Chou, W.P., Yeh, S.H., Chen, P.J., Chen, P.H., 2011. DNA detection using commercial mobile phones. *Biosens. Bioelectron.* 26, 4349–4354. doi:10.1016/j.bios.2011.04.036
- Lee, S.A., Yang, C., 2014. A smartphone-based chip-scale microscope using ambient illumination. *Lab Chip* 14, 3056–3063. doi:10.1039/c4lc00523f
- Lee, W.-I., Shrivastava, S., Duy, L.-T., Yeong Kim, B., Son, Y.-M., Lee, N.-E., 2017. A smartphone imaging-based label-free and dual-wavelength fluorescent biosensor with high sensitivity and accuracy. *Biosens. Bioelectron.* 94, 643–650. doi:10.1016/j.bios.2017.03.061
- Lu, Y., Shi, W., Qin, J., Lin, B., 2009. Low cost, portable detection of gold nanoparticle-labeled microfluidic immunoassay with camera cell phone. *Electrophoresis* 30, 579–582. doi:10.1002/elps.200800586
- Phillips, Z.F., D'Ambrosio, M. V., Tian, L., Rulison, J.J., Patel, H.S., Sadras, N., Gande, A. V., Switz, N.A., Fletcher, D.A., Waller, L., 2015. Multi-contrast imaging and digital refocusing on a mobile microscope with a domed LED array. *PLoS One* 10, 1–13. doi:10.1371/journal.pone.0124938
- Pirnstill, C.W., Coté, G.L., 2015. Malaria Diagnosis Using a Mobile Phone Polarized Microscope. *Sci. Rep.* 1–13. doi:10.1038/srep13368
- Preechaburana, P., Macken, S., Suska, A., Filippini, D., 2011. HDR imaging evaluation of a NT-proBNP test with a mobile phone. *Biosens. Bioelectron.* 26, 2107–2113. doi:10.1016/j.bios.2010.09.015
- Skandarajah, A., Reber, C.D., Switz, N.A., Fletcher, D.A., 2014. Quantitative Imaging with a Mobile Phone Microscope 9. doi:10.1371/journal.pone.0096906
- Switz, N.A., Ambrosio, M.V.D., Fletcher, D.A., 2014. Low-Cost Mobile Phone Microscopy with a Reversed Mobile Phone Camera Lens 9. doi:10.1371/journal.pone.0095330
- Wang, L.J., Chang, Y.C., Sun, R., Li, L., 2017. A multichannel smartphone optical biosensor for high-throughput point-of-care diagnostics. *Biosens. Bioelectron.* 87, 686–692. doi:10.1016/j.bios.2016.09.021
- Wei, G.Q., Qi, H., Luo, W., Tseng, D., Ki, S.J., Wan, Z., Bentolila, L.A., Wu, T., Sun, R., Ozcan, A., Pharmacology, M., Angeles, L., States, U., 2013. Fluorescent Imaging of Single Nanoparticles and Viruses on a Smart Phone 9147–9155.
- Zhang, G., Li, C., Lu, Y., Hu, H., Xiang, G., Liang, Z., Liao, P., Dai, P., Xing, W., Cheng, J., 2011. Validation of a mobile phone-assisted microarray decoding platform for signal-enhanced mutation detection. *Biosens. Bioelectron.* 26, 4708–4714. doi:10.1016/j.bios.2011.05.031
